# Supplementary material
Source: MDPI journal article supplement (https://www.mdpi.com/2071-1050/11/21/6175)
Supplement: s1 [file s1]

Supporting information for

# Valorizing waste lignocellulose-based furniture boards by phosphoric acid and hydrogen peroxide (PHP) pretreatment for bioethanol production and high-value lignin recovery

Jingwen Zhao<sup>1,2</sup>, Dong Tian<sup>1,2</sup>, Fei Shen<sup>1,2,\*</sup>, Jinguang Hu<sup>3,4</sup>, Yongmei Zeng<sup>1,2</sup>, Churui Huang<sup>1,2</sup>

1 Institute of Ecological and Environmental Sciences, Sichuan Agricultural University, Chengdu, Sichuan 611130, P. R. China;

2 Rural Environment Protection Engineering & Technology Center of Sichuan Province, Sichuan Agricultural University, Chengdu, Sichuan 611130, P. R. China;

3 Chemical and Petroleum Engineering, Schulich School of Engineering, the University of Calgary, Calgary, T2N 4H9, Canada;

4 Department of Wood Science, the University of British Columbia, Vancouver V6T 1Z4, BC, Canada;

\* Correspondence: [fishensjtu@gmail.com](mailto:fishensjtu@gmail.com) or [fishen@sicau.edu.cn](mailto:fishen@sicau.edu.cn); Tel: +86-28-86293087

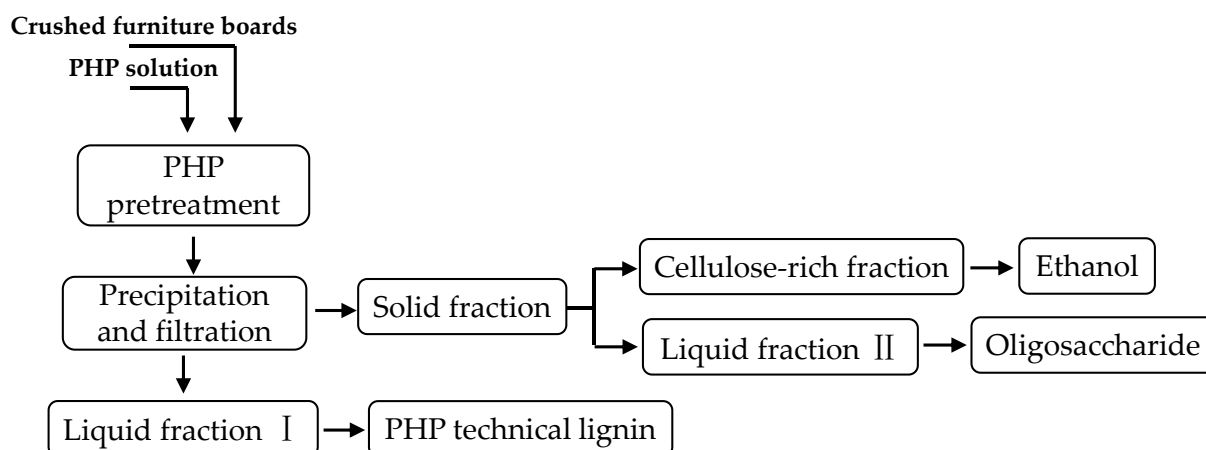

**Figure S1** The designed process of bioethanol production, high-value lignin and oligosaccharide recovery

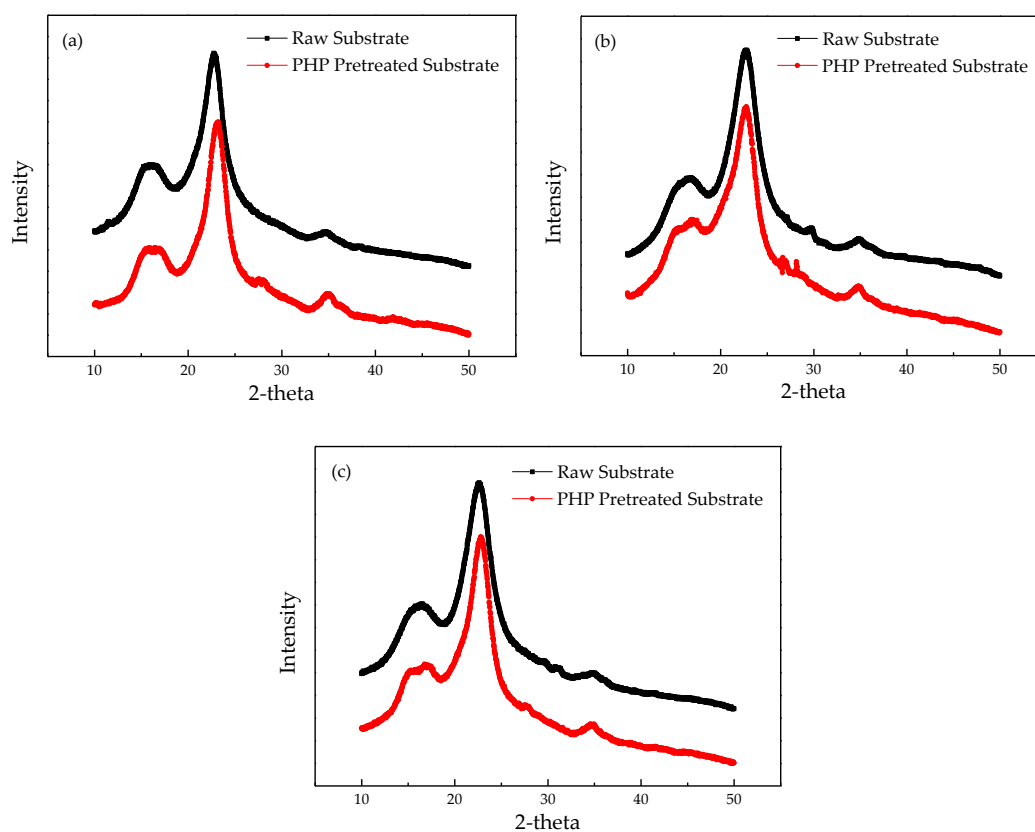

**Figure S2** Diagram of X-ray diffraction of these 3 furniture boards before/after pretreatment (a: fiberboard; b: chipboard; c: blockboard)

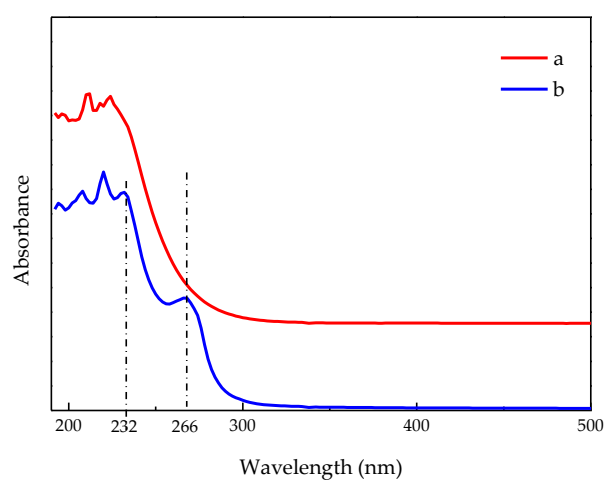

**Figure S3** The absorbance scanning spectra of the PHP solution at the wavelength from 190 nm to 500 nm (a: pure PHP solution; b: phenolic resin was added to the PHP solution)
